# Supplementary material
Source: MDPI journal article supplement (https://www.mdpi.com/2073-4395/13/5/1295)
Supplement: s1 [file s1]

## Supplementary Materials:

**Supplementary Table S1:** Number of days after sowing for each N fertilization supply until harvest.

|      | Sowing                 | 1 <sup>st</sup> Supply       | 2 <sup>nd</sup> Supply   | 3 <sup>rd</sup> Supply | Harvest                 |
|------|------------------------|------------------------------|--------------------------|------------------------|-------------------------|
| Year | Dry seed<br>(Zadok 00) | Full tillering<br>(Zadok 29) | First node<br>(Zadok 31) | Booting<br>(Zadok 41)  | Maturity<br>(Zadoks 99) |
| 2019 | 0                      | 149 days                     | 199 (+50) days           | 217 (+18) days         | 275 (+58) days          |
| 2020 | 0                      | 149 days                     | 166 (+17) days           | 194 (+28) days         | 269 (+75) days          |
| 2021 | 0                      | 144 days                     | 158 (+14) days           | 179 (+21) days         | 264 (+85) days          |

**Supplementary Table S2:** Vegetative and total plant biomass and their N contents in the different modes of N fertilization in the three successive years of the experiment. Different letters correspond to significant differences at  $p < 0.05$ . See Materials and Methods and Figure 2 for the meaning of the abbreviations.

| Year | N-Dose | Splitting | Vegetative Biomass<br>(kg·ha <sup>-1</sup> ) | Total Biomass<br>(kg·ha <sup>-1</sup> ) | Vegetative N<br>(kgN·ha <sup>-1</sup> ) | Total Plant N<br>(kgN·ha <sup>-1</sup> ) |
|------|--------|-----------|----------------------------------------------|-----------------------------------------|-----------------------------------------|------------------------------------------|
| 2019 | N0     | -         | 11008 <sup>c</sup>                           | 18164 <sup>c</sup>                      | 34.85 <sup>d</sup>                      | 136.82 <sup>e</sup>                      |
|      | N50    | S1        | 12812 <sup>b</sup>                           | 21092 <sup>b</sup>                      | 43.39 <sup>c</sup>                      | 181.79 <sup>d</sup>                      |
|      | N100   | S1        | 13112 <sup>b</sup>                           | 21820 <sup>b</sup>                      | 48.75 <sup>c</sup>                      | 197.85 <sup>cd</sup>                     |
|      | N150   | S1        | 13125 <sup>b</sup>                           | 21935 <sup>b</sup>                      | 53.90 <sup>bc</sup>                     | 214.16 <sup>c</sup>                      |
|      | N200   | S1        | 15103 <sup>a</sup>                           | 25795 <sup>a</sup>                      | 78.72 <sup>a</sup>                      | 279.82 <sup>a</sup>                      |
|      | N250   | S1        | 12600 <sup>b</sup>                           | 21622 <sup>b</sup>                      | 57.24 <sup>b</sup>                      | 248.89 <sup>b</sup>                      |
| 2020 | N0     | -         | 9867 <sup>c</sup>                            | 16171 <sup>e</sup>                      | 33.26 <sup>b</sup>                      | 111.94 <sup>f</sup>                      |
|      | N50    | S1        | 10677 <sup>bc</sup>                          | 17383 <sup>d</sup>                      | 36.57 <sup>b</sup>                      | 118.31 <sup>f</sup>                      |
|      | N100   | S1        | 11334 <sup>b</sup>                           | 19000 <sup>c</sup>                      | 37.13 <sup>b</sup>                      | 137.82 <sup>e</sup>                      |
|      | N150   | S1        | 11237 <sup>b</sup>                           | 19523 <sup>c</sup>                      | 39.79 <sup>b</sup>                      | 164.15 <sup>d</sup>                      |
|      | N200   | S1        | 13081 <sup>a</sup>                           | 24851 <sup>a</sup>                      | 62.25 <sup>ab</sup>                     | 280.70 <sup>a</sup>                      |
|      | N200   | S2        | 12928 <sup>a</sup>                           | 23477 <sup>b</sup>                      | 60.83 <sup>a</sup>                      | 242.79 <sup>b</sup>                      |
|      | N200   | S3        | 12988 <sup>a</sup>                           | 23039 <sup>b</sup>                      | 59.16 <sup>a</sup>                      | 207.97 <sup>c</sup>                      |
|      | N250   | S1        | 13050 <sup>a</sup>                           | 24030 <sup>ab</sup>                     | 58.57 <sup>a</sup>                      | 237.42 <sup>b</sup>                      |
| 2021 | N0     | -         | 8050 <sup>c</sup>                            | 17164 <sup>c</sup>                      | 44.88 <sup>c</sup>                      | 184.62 <sup>c</sup>                      |
|      | N50    | S1        | 9121 <sup>c</sup>                            | 18756 <sup>c</sup>                      | 46.38 <sup>c</sup>                      | 195.11 <sup>c</sup>                      |
|      | N100   | S1        | 10409 <sup>b</sup>                           | 21261 <sup>b</sup>                      | 68.03 <sup>b</sup>                      | 253.00 <sup>b</sup>                      |
|      | N150   | S1        | 10681 <sup>ab</sup>                          | 21939 <sup>b</sup>                      | 67.85 <sup>b</sup>                      | 258.89 <sup>b</sup>                      |
|      | N200   | S1        | 10937 <sup>ab</sup>                          | 22902 <sup>ab</sup>                     | 90.38 <sup>a</sup>                      | 300.51 <sup>a</sup>                      |
|      | N200   | S2        | 11303 <sup>ab</sup>                          | 22492 <sup>b</sup>                      | 74.65 <sup>ab</sup>                     | 266.11 <sup>b</sup>                      |
|      | N200   | S3        | 11091 <sup>ab</sup>                          | 21080 <sup>b</sup>                      | 78.33 <sup>ab</sup>                     | 259.95 <sup>b</sup>                      |
|      | N250   | S1        | 11838 <sup>a</sup>                           | 24026 <sup>a</sup>                      | 95.15 <sup>a</sup>                      | 319.08 <sup>a</sup>                      |
